1 **Title:** *C. elegans* detect the color of pigmented food sources to guide foraging decisions

2

3 **Authors:** D. Dipon Ghosh<sup>1</sup>, Xin Jin<sup>1</sup>, and Michael N. Nitabach<sup>1,2,3\*</sup>

4

5 **Affiliations:**

6 <sup>1</sup>Department of Cellular and Molecular Physiology, Yale University, New Haven, CT

7 <sup>2</sup>Department of Genetics, Yale University, New Haven, CT

8 <sup>3</sup>Program in Cellular Neuroscience, Neurodegeneration and Repair, Yale University, New  
9 Haven, CT

10

11 \*Correspondence to: [michael.nitabach@yale.edu](mailto:michael.nitabach@yale.edu)

12 **Abstract:**

13 Here we establish that contrary to expectations, *Caenorhabditis elegans* nematode worms  
14 possess a color discrimination system despite lacking any opsin or other photoreceptor genes.

15 We found that simulated daylight guides *C. elegans* foraging decisions with respect to harmful  
16 bacteria that secrete a blue pigment toxin. By absorbing yellow-orange light, this blue pigment  
17 toxin alters the color of light sensed by the worm, and thereby triggers an increase in avoidance  
18 of harmful bacteria. These studies thus establish the existence of a color detection system that is  
19 distinct from those of other animals. In addition, these studies reveal an unexpected contribution  
20 of microbial color display to visual ecology.

21

22 **One-sentence summary:**

23 Color detection contributes to *Caenorhabditis elegans* behavioral ecology by guiding  
24 foraging decisions.

25 **Main text:**

26 *C. elegans* live in decomposing organic matter where they feed on microorganisms (1-3),  
27 some of which secrete colorful pigments. While *C. elegans* lack any specialized photoreceptor  
28 cells or opsin genes, they possess an illuminance sensing system that mediates rapid escape  
29 responses to bright short-wavelength light (4-6). However, it is unknown whether *C. elegans* use  
30 light information, potentially including color, to inform complex decisions like foraging in  
31 environments containing colorful food sources. To address this question, we tested whether  
32 white light alters foraging decisions on *P. aeruginosa* bacterial lawns containing the blue  
33 pigment toxin pyocyanin, one of a number of small molecule phenazine toxins secreted by *P.*  
34 *aeruginosa* (7-10). Moderate intensity indirect daylight is typically 10-20 kilolux intensity and  
35 contains peaks in the blue and yellow-orange wavelength ranges (11). We selected an artificial  
36 LED array white light source with color temperature of 6500 K and 8 kilolux intensity to mimic  
37 these natural lighting conditions (**Fig. 1A**, see **fig. S1A**). Previous studies have shown that  
38 foraging decisions to remain on or leave a bacterial lawn are guided by a variety of factors (12,  
39 13). Worms remain on bacterial lawns that are easy to eat and support its growth, while leaving  
40 lawns that are of poor nutritive quality, repulsive, or pathogenic (12-17). Worms are initially  
41 attracted to *P. aeruginosa* lawns, but over a time course of hours, as the *P. aeruginosa* continues  
42 to divide and secrete toxins, they respond to its increasingly pathogenic qualities and begin to  
43 leave (15, 16, 18-21). Whether light plays a role in guiding avoidance of *P. aeruginosa* has never  
44 been tested. Here we employed a standard lawn avoidance assay, placing worms on a *P.*  
45 *aeruginosa* lawn in the center of an agar plate, and quantified avoidance as the fraction of worms  
46 found off the lawn as a function of time (**Fig. 1A**). Consistent with prior studies, worms  
47 gradually avoid *P. aeruginosa* strain PA14 over a span of many hours (15, 16, 18-21) (**Fig. 1A**).

48 Surprisingly, however, this avoidance is dramatically potentiated by simulated daylight (**Fig.**  
49 **1B**). This light has no effect on worms on lawns of non-toxic *E. coli* OP50 food bacteria, which  
50 they remain on without leaving (**Fig. 1B**).

51 Recent studies have implicated the *lite-1* gene – which encodes a non-canonical seven-  
52 transmembrane domain protein with closest homology to insect olfactory and gustatory  
53 chemoreceptors – in photophobic responses to bright short-wavelength light (4-6). To test  
54 whether the *lite-1* pathway is involved in light-dependent potentiation of PA14 avoidance, we  
55 compared avoidance of PA14 by *lite-1* null-mutant worms in the light and in the dark. Like wild-  
56 type worms, *lite-1* null-mutant worms gradually avoid PA14 over time, but their avoidance is  
57 unaffected by white light (**Fig. 1C**). These results indicate an essential role for the *lite-1* light  
58 response pathway in light-mediated potentiation of PA14 avoidance.

59 In order to determine whether the secreted blue toxin pyocyanin is involved in light-  
60 dependent potentiation of *P. aeruginosa* avoidance, we tested avoidance of a *phzM* mutant strain,  
61 PA14 $\Delta$ phzM. This strain lacks the biosynthetic enzyme necessary for pyocyanin synthesis, but  
62 still synthesizes other phenazine toxins (7-10, 22), and PA14 $\Delta$ phzM cultures are no longer blue  
63 (**Fig. 1D**). Simulated daylight has only a minimal effect on avoidance of PA14 $\Delta$ phzM by wild-  
64 type worms, and no effect on avoidance by *lite-1* null-mutant worms (**Fig. 1, E and F**). The  
65 *phzM* mutation has pleiotropic effects beyond absence of pyocyanin, which include, among other  
66 things, increased production and secretion of other phenazines (7). The results thus far establish  
67 light-dependent potentiation of PA14 avoidance requiring both the *lite-1* light response pathway  
68 of the worm and the blue toxin pyocyanin secreted by *P. aeruginosa*.

69 To circumvent complexities associated with *P. aeruginosa* lawns, which continue to  
70 divide and secrete phenazines over the course of the assay, we tested whether pyocyanin is

71 sufficient to mediate light-dependent potentiation of avoidance of otherwise non-toxic bacteria.  
72 Accordingly, we employed lawns of non-toxic *E. coli* OP50 doped with pyocyanin (**Fig. 2A**).  
73 Wild-type worms avoid OP50 doped with 2.5 mM pyocyanin within one hour of placing on the  
74 lawn, but only in the presence of simulated daylight (**Fig. 2B**). This is more rapid than the  
75 avoidance of PA14 (see **Fig. 1B**), and is already at the maximum avoidance reached during  
76 extended exposure (**Fig. 2B**). This rapid, unchanging avoidance of OP50 lawns doped with 2.5  
77 mM pyocyanin is likely due to the constant amount of pyocyanin present in the lawn, in contrast  
78 to *P. aeruginosa* lawns that continue to secrete pyocyanin over the course of the assay. In light of  
79 this unchanging avoidance of OP50 lawns doped with pyocyanin, for subsequent experiments we  
80 relied on this one hour time point. Like avoidance of PA14, light-dependent avoidance of OP50  
81 + 2.5 mM pyocyanin is abolished by the *lite-1* null mutation (**Fig. 2C**). While doping with 0.25  
82 mM pyocyanin fails to elicit avoidance, worms avoid OP50 + 5 mM pyocyanin both in the light  
83 and dark, and independently of *lite-1* function (**Fig. 2C**). These results indicate that an  
84 intermediate concentration of pyocyanin confers light-dependent and *lite-1*-dependent rapid  
85 avoidance of otherwise innocuous food bacteria, with higher concentrations conferring  
86 avoidance independent of light or *lite-1*.

87 *lite-1* is expressed in a number of neurons in the worm nervous system, including the  
88 primary sensory neurons ASJ, ASI, and ASK (5, 6, 23). ASJ and ASI have been previously  
89 implicated in long-term avoidance of PA14 mediated by their direct responses to phenazines  
90 with Ca<sup>2+</sup> increases and gene activation (16). In addition, *lite-1* expression in ASJ and ASK is  
91 sufficient for escape responses to short-wavelength light (5, 6). To determine the cellular locus of  
92 *lite-1* expression responsible for rapid light-dependent avoidance of OP50 + 2.5 mM pyocyanin,  
93 we employed *lite-1* null-mutant worms with targeted re-expression of *lite-1* in neurons ASJ,

94 ASH/ASI/PVQ, or ASK. Restoration of *lite-1* expression in ASJ or ASH/ASI/PVQ are each  
95 sufficient to rescue rapid light-dependent avoidance of OP50 + 2.5 mM pyocyanin, while  
96 restoration in ASK is not (**Fig. 2D**). These results localize *lite-1* function in rapid light- and  
97 pyocyanin-dependent bacteria avoidance to a small number of primary sensory neurons also  
98 involved in long-term avoidance of PA14, and which only partially overlap with those  
99 responsible for escape responses to short-wavelength light (**Fig. 2E**).

100 To test whether the blue color of pyocyanin independent of its toxic chemistry is  
101 sufficient to induce rapid avoidance of non-toxic OP50 lawns, we employed OP50 lawns doped  
102 with non-toxic inert blue food dye (**Fig. 3A**). Neither wild-type nor *lite-1* null-mutant worms  
103 avoid OP50 lawns doped with blue food dye, whether in dark or light, indicating that it is not  
104 solely the blue color of pyocyanin that drives light-potentiated rapid avoidance but also its  
105 chemical reactivity (**Fig. 3B**). One of the chemical features of pyocyanin that confers toxicity is  
106 that it enters eukaryotic cells and generates reactive oxygen species (ROS) through various  
107 mechanisms (7-10, 22). To determine if pyocyanin's combination of blue color and ROS-  
108 generating toxic chemistry underlies light-potentiated avoidance, we employed OP50 lawns  
109 doped with the colorless ROS-generating toxin paraquat (24) and non-toxic inert blue food dye  
110 (**Fig. 3C**). Wild-type worms rapidly avoid OP50 doped with 30 mM paraquat and blue dye, but  
111 only in the presence of light (**Fig. 3D**). This light-potentiated avoidance is abolished in *lite-1*  
112 null-mutant worms (**Fig. 3D**). As with OP50 + pyocyanin, higher concentrations of paraquat  
113 mediate rapid avoidance independent of both incident light and *lite-1*, while lower concentrations  
114 of paraquat with blue dye are insufficient to mediate avoidance (**Fig. 3D**). Doping OP50 lawns  
115 with 30 mM paraquat without any dye or with inert non-toxic red dye (**Fig. 3D**) are each  
116 insufficient to confer light-potentiated avoidance (**Fig. 3F**). These results indicate that rapid

117 light- and *lite-1*-dependent avoidance of pyocyanin-containing bacterial lawns relies both on its  
118 chemical reactivity as a generator of ROS and on its blue color. They also indicate that  
119 avoidance conferred by higher concentrations of pyocyanin relies solely on its ROS-generating  
120 capacity and is independent of *lite-1* function. This integration of color and chemical information  
121 to guide avoidance of food sources could enable more accurate discrimination of toxic from non-  
122 toxic lawns.

123 We hypothesized that blue pigment confers rapid light-potentiated avoidance of bacterial  
124 lawns containing ROS-generating toxins by absorbing long-wavelength light and thereby altering  
125 the spectral composition of light sensed by the worm. To test this possibility, we employed a  
126 series of shortpass and longpass optical filters to alter the spectra of incident light (corresponding  
127 photographs and spectra of filtered light are shown in **fig. S2**). Consistent with the previously  
128 determined action spectrum for *lite-1*-dependent photophobic responses (4-6), longpass filtered  
129 light lacking blue light fails to potentiate avoidance of OP50 + 2.5 mM pyocyanin (**Fig. 4A**).  
130 Surprisingly, however, light shortpass filtered with cut-offs of <500 nm or <550 nm also failed to  
131 potentiate avoidance (**Fig. 4A**). Only light shortpass filtered with <600 nm cut-off, which still  
132 includes the yellow-orange peak of 6500 K simulated daylight, was sufficient to potentiate  
133 avoidance of OP50 + 2.5 mM pyocyanin (**Fig. 4A**). This establishes that light-potentiated  
134 avoidance of bacterial lawns containing ROS-generating toxins and blue pigment requires not  
135 only short-wavelength blue light, but also long-wavelength yellow-orange light. This suggests  
136 the existence of a yellow-orange sensing pathway in addition to the *lite-1*-dependent blue light  
137 pathway.

138 Completely eliminating yellow-orange light abolishes light-dependent potentiation of  
139 avoidance of OP50 + 2.5 mM pyocyanin (**Fig. 4A**). Thus, we hypothesized that the presence of

140 blue pigment in the lawn reduces, but without eliminating, the yellow-orange content of light  
141 sensed by the worm, and that it is this decreased ratio of yellow-orange to blue light that  
142 potentiates avoidance of bacterial lawns containing ROS-generating toxins. It is uncertain  
143 exactly how blue pigment in its microenvironment alters the spectrum of light sensed by the  
144 worm. To circumvent this uncertainty, we eliminated blue pigment from the lawn and directly  
145 modified the spectral composition of light sensed by the worm with a “blue vinyl” filter that  
146 reduces without eliminating yellow-orange content to mimic the hypothesized effect of blue  
147 pigment (**Fig. 4B, fig. S2, A and B**). Remarkably, simulated daylight filtered through this blue  
148 vinyl filter recapitulates white light-potentiated rapid avoidance of OP50 + 30 mM paraquat, but  
149 now in the absence of blue pigment in the lawn (**Fig. 4C**). These results indicate that blue  
150 pigments confer light-potentiated avoidance of toxic bacterial lawns by absorbing yellow-orange  
151 light and thereby altering the spectral composition of light sensed by the worm. They also imply  
152 the existence of a yellow-orange light-sensing pathway that is required to be activated to  
153 potentiate avoidance of toxic lawns, but with activation of this pathway beyond some threshold  
154 preventing such potentiation.

155       As a further test of the hypothesis that it is the altered color of light, specifically the blue-  
156 to-yellow-orange ratio, that potentiates avoidance and not altered illuminance, we altered the  
157 intensity of simulated daylight (**fig. S3A**). Increasing white light intensity by ~3-fold to 25 klx  
158 failed to increase avoidance of OP50 + 30 mM paraquat (**fig. S3B**), supporting the hypothesis  
159 that it is the blue-to-yellow-orange ratio, and not illuminance, driving light-potentiated  
160 avoidance. While further increases to 50 klx or 100 klx did mediate increased avoidance of OP50  
161 + 30 mM paraquat, these very high light intensities closer to that of direct sunlight (100-120  
162 kilolux) identically increase avoidance of OP50 lawns without paraquat, most likely by



163 triggering *lite-1*-dependent escape responses (**fig. S3B**). Since *lite-1*-dependent responses to very  
164 bright light may themselves involve ROS (23), we used H2DCFDA, a fluorescent ROS indicator,  
165 to determine if intensities of light used in our experiments induce detectable ROS production in  
166 worms. No ROS signal is detected in worms placed on OP50 lawns doped with 30 mM paraquat  
167 in the dark or exposed to 8 klx white light for one hour (**fig. S3, C and D**). In contrast,  
168 substantial ROS signal is detected in worms on OP50 lawns exposed to 100 klx white light for  
169 one hour, regardless of whether paraquat is present (**fig. S3, C and D**). These results further  
170 support the conclusion that avoidance of toxic bacterial lawns potentiated by moderate intensity  
171 light operates by a different mechanism than photophobic responses to brighter light. They also  
172 rule out the possibility that blue pigment potentiates avoidance of bacterial lawns containing  
173 ROS-generating toxins by scattering blue light and thereby increasing activation of the *lite-1*  
174 short-wavelength light-sensing pathway.

175       Taken together, our results thus establish that *C. elegans* worms are capable of  
176 discriminating color in their environment by comparing activation of blue- and yellow-orange-  
177 sensitive pathways to guide foraging decisions on colorful toxic food sources. This reveals an  
178 unexpected mechanism by which color detection contributes to *C. elegans* behavioral ecology by  
179 heightening vigilance to ROS and thereby guiding foraging decisions on toxic bacteria (**Fig. 4D**).  
180 To our knowledge this is the first demonstration of the effect of microbial color display on an  
181 animal's foraging decision. Another example of color display by potential food sources  
182 influencing foraging decisions can be found in butterflies. Some non-toxic butterfly species  
183 mimic the coloration pattern of toxic butterflies in the same ecological niche to ward off  
184 predation (25). While selective pressure may have driven the worm's association between blue  
185 color and toxic food sources, blue color itself is insufficient to drive avoidance (see **Fig. 3, A**

186 **and B**). This raises the possibility that other non-toxic bacterial species may have co-opted blue  
187 coloration to ward off being eaten, forcing worms to be more vigilant in the presence of blue  
188 pigments while simultaneously considering information beyond color alone to avoid being  
189 tricked by mimics.  
190

191 **References:**

- 192 1. M. A. Felix, F. Duveau, Population dynamics and habitat sharing of natural populations  
193 of *Caenorhabditis elegans* and *C. briggsae*. *BMC Biol* **10**, 59 (2012).
- 194 2. L. Frezal, M. A. Felix, *C. elegans* outside the Petri dish. *Elife* **4**, (2015).
- 195 3. B. S. Samuel, H. Rowedder, C. Braendle, M. A. Felix, G. Ruvkun, *Caenorhabditis*  
196 *elegans* responses to bacteria from its natural habitats. *Proceedings of the National*  
197 *Academy of Sciences of the United States of America*, (2016).
- 198 4. S. L. Edwards *et al.*, A novel molecular solution for ultraviolet light detection in  
199 *Caenorhabditis elegans*. *PLoS biology* **6**, e198 (2008).
- 200 5. J. Liu *et al.*, *C. elegans* phototransduction requires a G protein-dependent cGMP pathway  
201 and a taste receptor homolog. *Nature neuroscience* **13**, 715-722 (2010).
- 202 6. A. Ward, J. Liu, Z. Feng, X. Z. Xu, Light-sensitive neurons and channels mediate  
203 phototaxis in *C. elegans*. *Nature neuroscience* **11**, 916-922 (2008).
- 204 7. B. Cezairliyan *et al.*, Identification of *Pseudomonas aeruginosa* phenazines that kill  
205 *Caenorhabditis elegans*. *PLoS Pathog* **9**, e1003101 (2013).
- 206 8. S. Mahajan-Miklos, M. W. Tan, L. G. Rahme, F. M. Ausubel, Molecular mechanisms of  
207 bacterial virulence elucidated using a *Pseudomonas aeruginosa*-*Caenorhabditis elegans*  
208 pathogenesis model. *Cell* **96**, 47-56 (1999).
- 209 9. M. W. Tan, S. Mahajan-Miklos, F. M. Ausubel, Killing of *Caenorhabditis elegans* by  
210 *Pseudomonas aeruginosa* used to model mammalian bacterial pathogenesis. *Proceedings*  
211 *of the National Academy of Sciences of the United States of America* **96**, 715-720 (1999).
- 212 10. M. W. Tan, L. G. Rahme, J. A. Sternberg, R. G. Tompkins, F. M. Ausubel, *Pseudomonas*  
213 *aeruginosa* killing of *Caenorhabditis elegans* used to identify *P. aeruginosa* virulence

- 214 factors. *Proceedings of the National Academy of Sciences of the United States of America*  
215 **96**, 2408-2413 (1999).
- 216 11. L. Walmsley *et al.*, Colour as a signal for entraining the mammalian circadian clock.  
217 *PLoS biology* **13**, e1002127 (2015).
- 218 12. A. Bendesky, M. Tsunozaki, M. V. Rockman, L. Kruglyak, C. I. Bargmann,  
219 Catecholamine receptor polymorphisms affect decision-making in *C. elegans*. *Nature*  
220 **472**, 313-318 (2011).
- 221 13. B. B. Shtonda, L. Avery, Dietary choice behavior in *Caenorhabditis elegans*. *J Exp Biol*  
222 **209**, 89-102 (2006).
- 223 14. E. Beale, G. Li, M. W. Tan, K. P. Rumbaugh, *Caenorhabditis elegans* senses bacterial  
224 autoinducers. *Appl Environ Microbiol* **72**, 5135-5137 (2006).
- 225 15. J. D. Meisel, D. H. Kim, Behavioral avoidance of pathogenic bacteria by *Caenorhabditis*  
226 *elegans*. *Trends Immunol* **35**, 465-470 (2014).
- 227 16. J. D. Meisel, O. Panda, P. Mahanti, F. C. Schroeder, D. H. Kim, Chemosensation of  
228 bacterial secondary metabolites modulates neuroendocrine signaling and behavior of *C.*  
229 *elegans*. *Cell* **159**, 267-280 (2014).
- 230 17. E. Pradel *et al.*, Detection and avoidance of a natural product from the pathogenic  
231 bacterium *Serratia marcescens* by *Caenorhabditis elegans*. *Proceedings of the National*  
232 *Academy of Sciences of the United States of America* **104**, 2295-2300 (2007).
- 233 18. H. C. Chang, J. Paek, D. H. Kim, Natural polymorphisms in *C. elegans* HECW-1 E3  
234 ligase affect pathogen avoidance behaviour. *Nature* **480**, 525-529 (2011).
- 235 19. X. Jin, N. Pokala, C. I. Bargmann, Distinct Circuits for the Formation and Retrieval of an  
236 Imprinted Olfactory Memory. *Cell* **164**, 632-643 (2016).

- 237 20. K. C. Reddy, E. C. Andersen, L. Kruglyak, D. H. Kim, A polymorphism in *npr-1* is a  
238 behavioral determinant of pathogen susceptibility in *C. elegans*. *Science* **323**, 382-384  
239 (2009).
- 240 21. Y. Zhang, H. Lu, C. I. Bargmann, Pathogenic bacteria induce aversive olfactory learning  
241 in *Caenorhabditis elegans*. *Nature* **438**, 179-184 (2005).
- 242 22. G. W. Lau, D. J. Hassett, H. Ran, F. Kong, The role of pyocyanin in *Pseudomonas*  
243 *aeruginosa* infection. *Trends Mol Med* **10**, 599-606 (2004).
- 244 23. N. Bhatla, H. R. Horvitz, Light and hydrogen peroxide inhibit *C. elegans* Feeding  
245 through gustatory receptor orthologs and pharyngeal neurons. *Neuron* **85**, 804-818  
246 (2015).
- 247 24. T. Blanco-Ayala, A. C. Anderica-Romero, J. Pedraza-Chaverri, New insights into  
248 antioxidant strategies against paraquat toxicity. *Free Radic Res* **48**, 623-640 (2014).
- 249 25. T. Booker, R. W. Ness, D. Charlesworth, Molecular evolution: breakthroughs and  
250 mysteries in Batesian mimicry. *Current biology : CB* **25**, R506-508 (2015).

251

252

253 **Acknowledgments:**

254 We thank S. Xu and the Caenorhabditis Genetics Center for *C. elegans* strains, F. Ausubel for *P.*  
255 *aeruginosa* strains, and members of the Nitabach and Kazmierczak labs and the Yale worm  
256 community for technical support, advice, and comments. D.D.G was supported by a National  
257 Institute of Neurological Disease and Stroke (NINDS) National Institutes of Health (NIH)  
258 Predoctoral Fellowship (F31NS080628). Work in the laboratory of M.N.N. was supported in part  
259 by NINDS, NIH (R01NS055035, R01NS056443, R01NS091070) and National Institute of  
260 General Medical Sciences, NIH (R01GM098931).

261

262 **Figure 1. Light-potentiated avoidance of *P. aeruginosa* requires *lite-1* and pyocyanin blue**  
263 **pigment toxin.**

264 **A.** Schematic of bacterial lawn avoidance paradigm. Worms (black squiggles) are placed on a  
265 lawn of *P. aeruginosa* strain PA14. Photographs are of *P. aeruginosa* PA14 liquid culture and 8  
266 kilolux 6500 K white light with corresponding spectrum as measured by a CCD spectrometer.  
267 The fraction of worms outside the lawn is counted once per hour in the absence (dark) or  
268 presence (light) of 8 kilolux 6500 K white light simulating daylight illuminating the entire plate.

269 **B.** Timecourse of wild-type worm avoidance of lawns of PA14 or *E. coli* OP50 in the presence  
270 of light or in the dark. Over the course of the nine hour assay, worms increase avoidance of  
271 PA14 in the light (orange) and dark (black), but this avoidance is greatly potentiated by white  
272 light. Worms remain on OP50 lawns (red) throughout the nine hour assay in the presence of  
273 light. **C.** Avoidance of PA14 by *lite-1* null-mutant worms is unaffected by white light. **D.**

274 Schematic of lawn avoidance paradigm involving *P. aeruginosa* strain PA14 $\Delta$ phzM, which is  
275 incapable of synthesizing pyocyanin. Photographs are of *P. aeruginosa* PA14 $\Delta$ phzM liquid  
276 culture (note the change in color when pyocyanin is absent) and 8 kilolux 6500 K white light  
277 used in these experiments. **E.** White light has a less pronounced effect on avoidance by wild-type  
278 worms of mutant *P. aeruginosa* strain incapable of synthesizing pyocyanin. **F.** Avoidance of  
279 PA14 $\Delta$ phzM by *lite-1* null-mutant worms is unaffected by white light. (Data represent an  
280 average of at least three assays with thirty worms per assay. All statistical comparisons are by  
281 two-way ANOVA with time as a repeated measure and post-hoc Bonferroni tests. For  
282 corresponding *p* and F values, see Supplemental Table 1. Error bars denote s.e.m. \* indicates  $p <$   
283 0.05, \*\* indicates  $p \leq 0.01$ , and \*\*\* indicates  $p \leq 0.001$ .)

284 **Figure 2. Light potentiates avoidance of non-toxic *E. coli* lawns doped with pyocyanin.**

285 **A.** Schematic of experimental design for testing avoidance of *E. coli* OP50 lawns doped with  
286 pyocyanin. Photographs are of *E. coli* OP50 liquid culture and doping solutions used in these  
287 experiments. **B.** Timecourse of avoidance by wild-type worms of *E. coli* OP50 lawns doped with  
288 2.5 mM pyocyanin in the presence or absence of light reveals white light potentiation of stable,  
289 long-term, avoidance of OP50 lawns. For corresponding *p* and F values, see Supplemental Table  
290 1. **C.** White light potentiates rapid one-hour avoidance of OP50 lawns doped with 2.5 mM  
291 pyocyanin by wild-type but not *lite-1* null-mutant worms. Avoidance of OP50 lawns doped with  
292 0.25 mM or 5 mM pyocyanin is unaffected by light. **D.** Re-expression of *lite-1* in *lite-1* null-  
293 mutant worms using the *trx-1* or *sra-6* promoters for expression in neurons ASJ and  
294 ASH/ASI/PVQ, respectively, rescues light-potentiated avoidance of OP50 lawns doped with 2.5  
295 mM pyocyanin. Re-expression of *lite-1* using the *srg-8* promoter for expression in sensory  
296 neuron ASK has no effect. **E.** *lite-1* function in rapid light- and pyocyanin-dependent lawn  
297 avoidance localizes to a small number of primary sensory neurons previously shown to be  
298 involved in long-term PA14 avoidance, and only partially overlaps with those involved in escape  
299 responses to bright short-wavelength light. (Data in this figure and all remaining figures  
300 represent an average of at least three assays with thirty worms per assay. All statistical analyses  
301 were performed by one-way ANOVA with post-hoc Tukey-Kramer for pairwise comparisons or  
302 Bonferroni tests for comparisons with control. Error bars denote s.e.m. \* indicates  $p < 0.05$ , \*\*  
303 indicates  $p \leq 0.01$ , and \*\*\* indicates  $p \leq 0.001$ .)



304 **Figure 3. Light potentiates avoidance of *E. coli* lawns doped with paraquat colorless toxin**  
305 **mixed with non-toxic blue dye.**

306 **A.** Experimental design for testing avoidance of OP50 lawns doped with non-toxic blue food  
307 dye. Photographs are of *E. coli* OP50 liquid culture and doping solutions used in these  
308 experiments. **B.** Avoidance of OP50 lawns doped solely with blue dye is unaffected by white  
309 light. **C.** Experimental design for testing avoidance of OP50 lawns doped with toxic paraquat and  
310 non-toxic blue dye. **D.** White light potentiates avoidance of OP50 lawns doped with 30 mM  
311 paraquat and blue dye by wild-type but not *lite-1* null-mutant worms. Avoidance of OP50 lawns  
312 doped with 20 mM or 40 mM paraquat and blue dye is unaffected by light. **E.** Experimental  
313 design for testing avoidance of OP50 lawns doped with toxic paraquat with no dye or with non-  
314 toxic red food dye. **F.** Avoidance of OP50 doped with 30 mM paraquat alone or paired with red  
315 dye is unaffected by white light.

316 **Figure 4. Color of light determines avoidance of toxic bacterial lawns.**

317 **A.** The spectral composition of light was modified by various optical filters. Photographs are of  
318 *E. coli* OP50 liquid culture and doping solutions used in these experiments, as well as lights  
319 modified by the indicated filter shining on a white background. Light spectra were measured  
320 using a CCD spectrometer. Blue light or blue-green light obtained with 500 nm or 550 nm cut-  
321 off shortpass filters each fail to potentiate avoidance of OP50 lawns doped with 2.5 mM  
322 pyocyanin. White light without blue light obtained with a 495 nm longpass filter also fails to  
323 potentiate avoidance. Only light containing both blue and yellow-orange light, obtained with a  
324 600 nm cut-off shortpass filter, potentiates avoidance of OP50 doped with 2.5 mM pyocyanin. **B.**  
325 Experimental design for testing whether blue pigment causes light-potentiated avoidance by

326 absorbing long-wavelength light and altering the spectral composition of light sensed by the  
327 worm, by eliminating blue pigment from the lawn and directly controlling the spectral  
328 composition of light with filters. **C.** Light modified by a blue vinyl filter that decreases intensity  
329 of yellow-orange light without eliminating it potentiates avoidance of colorless OP50 lawns  
330 doped with 30 mM paraquat, but not lawns lacking paraquat. **D.** Schematic depicting the  
331 multisensory decision whereby integration of color and chemical information guides the foraging  
332 decision to stay on or leave toxic or non-toxic bacterial lawns. Blue pigment absorbs long-  
333 wavelength light and thereby alters the spectral composition of light detected by the worm. We  
334 propose that worms increase their vigilance to ROS when they detect a decrease in yellow-  
335 orange light content induced by blue pigments in their environment.

336

337 **Supplementary Materials:**

338 **Supplementary Figure 1. Spectral composition of 6500 K 8 kilolux LED array white light**  
339 **source.**

340 **A.** Photograph and spectral profile of white LED backlight as measured using a CCD  
341 spectrometer.

342 **Supplementary Figure 2. Spectral composition of white light modified by filters.**

343 **A.** Photographs of 8 klx white light modified by various filters. **B.** Spectral profiles of white light  
344 modified by LP (longpass) or SP (shortpass) filters with cut-offs at the indicated wavelengths  
345 were measured using a CCD spectrometer.

346 **Supplementary Figure 3. Bright white light fails to potentiate avoidance of toxic colorless**  
347 **bacterial lawns.**

348 **A.** Experimental design for testing whether increasing flux of blue light by increasing intensity  
349 of incident white light potentiates avoidance of colorless toxic food lawns. **B.** Increasing white  
350 light intensity ~3-fold to 25 klx fails to potentiate avoidance of OP50 lawns doped with 30 mM  
351 paraquat containing no blue dye. While further increases in white light intensity to 50 or 100 klx  
352 potentiate avoidance of OP50 lawns, this is independent of the presence of paraquat. **C.**  
353 Representative fluorescent images of the ROS-dependent indicator H2DCFDA in worms  
354 exposed to various intensities of white light for one hour, with or without 30 mM paraquat. **D.**  
355 Quantification of fluorescence from experiments shown in panel **c**. For each condition, at least 7  
356 worms from 3 independent experiments were analyzed. Statistical analysis was performed by  
357 one-way ANOVA with post-hoc Tukey-Kramer for pairwise comparisons.

358 **Supplemental Table 1. F-values and *p* values from statistical analyses performed by two-**  
359 **way ANOVA with time as a repeated measure.**

| <b>Comparison</b>                                                          | <b>Relevant panel</b> | <b>F-value (time)</b> | <b><i>p</i> value (time)</b> | <b>F-value (condition)</b> | <b><i>p</i> value (condition)</b> |
|----------------------------------------------------------------------------|-----------------------|-----------------------|------------------------------|----------------------------|-----------------------------------|
| Wild-type worms on PA14 lawn, light vs. dark                               | Figure 1b             | 44.18                 | < 0.0001                     | 27.57                      | 0.0033                            |
| <i>lite-1</i> null-mutant worms on PA14 lawn, light vs. dark               | Figure 1c             | 52.93                 | < 0.0001                     | 0.7630                     | 0.4223                            |
| Wild-type worms on PA14 $\Delta$ phzM lawn, light vs. dark                 | Figure 1e             | 27.04                 | < 0.0001                     | 10.06                      | 0.0248                            |
| <i>lite-1</i> null-mutant worms on PA14 $\Delta$ phzM lawn, light vs. dark | Figure 1f             | 26.31                 | < 0.0001                     | 0.1715                     | 0.6960                            |
| Wild-type worms on OP50 + 2.5 mM, light vs. dark                           | Figure 2b             | 0.4251                | 0.8891                       | 462.3                      | 0.0022                            |

360

361

362 **Materials and Methods:**

363 Strains

364 *C. elegans* strains were maintained on Nematode Growth Medium (NGM) agar plates with *E.*  
365 *coli* OP50 as a food source. All strains were derived from the Bristol N2 wild-type strain. The  
366 *lite-1* null-mutant strain was backcrossed to wild-type N2 at least 5 times. Strains used for each  
367 figure are detailed below:

368 Figure 1: N2, KG1180 *lite-1(ce314)*

369 Figure 2: N2, KG1180 *lite-1(ce314)*, TQ1101 *lite-1(xu7)*, TQ1179 *lite-1(xu7)*; xuEx301 [*sra-*  
370 *6p::lite-1::sl2::yfp*; *sra-6p::mCherry2*; *unc-122p::DsRed*], TQ1188 *lite-1(xu7)*; xuEx7 [*trxp-*  
371 *1::lite-1*; *unc-122p::gfp*; *trx-1p::mCherry2*], TQ1203 *lite-1(xu7)*; xuEx [*srg-8p::lite-1::sl2::yfp*;  
372 *unc-122p::gfp*; *srg-8p::mCherry2*]

373 Figure 3: N2, KG1180 *lite-1(ce314)*

374 Figure 4: N2

375 Supplementary Figure 3: N2

376 Lawn avoidance assay

377 *P. aeruginosa* lawn avoidance assays were performed on slow killing assay (SKA) plates as  
378 described (8-10, 16, 18, 20). *P. aeruginosa* cultures were grown in LB liquid media at 37°C for  
379 16-22 hours. 7 µL spots were added to the center of a 3.5 cm plate filled with 5 mL of SKA agar.  
380 Plates were first incubated at 37°C for 22-24 hours, and then at room temperature for 16-20  
381 hours. Worms were maintained in regular room lighting or incubator lighting conditions.

382 Growing worms in the presence or absence of light had no effect on assay results (data not  
383 shown). Thirty 18-24 hours post-L4 staged adult worms were transferred to the lawn for each  
384 assay. The fraction of worms out of those thirty that were off the lawn after the specified time  
385 interval was recorded as fraction avoiding.

386 Solutions of specified concentrations of pyocyanin (Cayman Chemical) and paraquat (ULTRA  
387 Scientific) were added to *E. coli* OP50 lawns on plates prepared exactly as described above.  
388 Erioglaucine (Alfa Aesar) or sulfarhodamine (MP Biomedicals) were used for blue and red color,  
389 respectively. Before adding solution, a 1.5 mL Eppendorf tube cut open at both ends was placed  
390 on the plate such that the rim of the tube circumscribed the boundary of the lawn. Next, 300  $\mu$ L  
391 of the indicated solution was added to the tube to direct gradual application of solution to the  
392 lawn. Plates were prepared accordingly for three hours to allow for complete drying of the  
393 solution before transferring worms to the lawn and beginning the assay.

#### 394 Statistical analysis

395 Sample sizes were chosen to ensure that at least two sets of experiments for each condition were  
396 carried out. No samples or animals were excluded from statistical analysis. Animals of a  
397 particular genotype were randomly assigned to assay plates. The order of assay plates loaded  
398 with worms was also randomized for each experiment, ensuring that the order of conditions  
399 tested was randomized. The investigator was blinded to genotype and condition (e.g., PA14  
400 strain, concentration of paraquat) throughout, but not to different lighting conditions (e.g., light  
401 vs. dark, filter vs. no filter).

402 At least three independent assays were performed for each condition. For time course  
403 experiments in Figures 1 and 2, two-way ANOVA with time as a repeated measure and post-hoc  
404 Bonferroni tests was used to analyze statistical differences.

405 For all other experiments, one-way ANOVA was used to analyze statistical differences, with  
406 post-hoc Tukey-Kramer tests performed for pairwise comparisons between all conditions or  
407 post-hoc Bonferroni tests performed for comparisons to control. \* indicates  $p < 0.05$ , \*\*  
408 indicates  $p \leq 0.01$ , and \*\*\* indicates  $p \leq 0.001$ .

#### 409 Illumination

410 For experiments shown in Figures 1, 2, and 3, assay plates were illuminated in a completely dark  
411 room by a white LED backlight (Edmund Optics, Stock Number #83-873). After taking the lid  
412 off the plates, the plates were inverted onto the backlight. For assays performed in the dark,  
413 plates were positioned similarly either with the light off or on aluminum foil to block the light.

414 For experiments shown in Figure 4 and Extended Data Figure 3, plates were illuminated by a  
415 white LED (Thorlabs MCWHL5 with SM2P50-A attached) clamped to a ring stand. LEDs were  
416 positioned 18 cm above the plate, illuminating a 5 cm diameter spot covering the entire 3.5 cm  
417 diameter assay plate. Assay plates were always centered within this spot to circumvent any  
418 effects of imperfect collimation of the incident light. Multiple plates were illuminated  
419 simultaneously, each by a single LED. Multiple LEDs were powered simultaneously by a 4-  
420 Channel LED Driver (Thorlabs DC4100). In this lighting configuration, plate lids were removed,  
421 but plates remained upright.

422 A calibrated optometer Gamma Scientific (UDT Instruments Model S471 with 268P illuminance  
423 sensor) was used to measure illuminance. Irradiance at specified wavelengths was measured  
424 using the same instrument, but connected to a 268R sensor head that was continuously calibrated  
425 from 350 nm to 1100 nm. Irradiance at 470 nm was measured after filtering the light source  
426 through 500 nm shortpass filters.

427 The following filters were used in the experiments shown in Figure 4: 495 nm longpass filter  
428 (Thorlabs FGL495S), 500 nm shortpass filter (Edmund Optics Stock Number 64663), 550 nm  
429 shortpass filter (Edmund Optics Stock Number 64664), 600 nm shortpass filter (Edmund Optics  
430 Stock Number 64665), and a blue vinyl sheet (Hull's Art store). Spectral profiles were measured  
431 using a compact CCD spectrometer (Thorlabs CCS100 with connected cosine corrector CCSB1).  
432 Relative intensities measured by the spectrometer do not permit comparisons of absolute  
433 intensity between the various filters. Illuminance of white light modified by each filter was  
434 calibrated to ensure that the intensity of short-wavelength (470 nm) light passing through each  
435 filter was identical as measured using a calibrated irradiance detector described above. This only  
436 applied to white light modified by the blue vinyl filter, which required calibration of < 1 klx.

#### 437 ROS detection

438 After exposure to the specified light/dark and paraquat conditions, worms were washed three  
439 times with M9 buffer. Seven to nine worms from each treatment group were incubated with 25  
440  $\mu\text{M}$  2',7'-dichlorodihydrofluorescein (Biotium) in the dark for 30 min at 20 °C. After  
441 H2DCFDA incubation, worms were washed with M9 solution and mounted in PBS buffer  
442 containing 1 mM sodium azide. Fluorescence was measured immediately after mounting to  
443 slides using a Leica M165FC fluorescent stereomicroscope at excitation/emission wavelengths of



444 488 nm and 520 nm. The mean fluorescence intensity of the whole body of the worm was  
445 quantified using ImageJ software. Values were then compared using one-way ANOVA with  
446 post-hoc Tukey-Kramer test. For each condition, at least 7 worms from 3 independent  
447 experiments were analyzed.

448 **Additional Author notes:**

449 *Author Contributions*

450 Designed study and experiments: DDG, MNN

451 Performed experiments: DDG, XJ

452 Data analysis and statistics: DDG, XJ

453 Wrote the paper: DDG, MNN

454 *Author Information*

455 The authors declare no conflicts of interest.

456 Correspondence and requests for material should be addressed to [michael.nitabach@yale.edu](mailto:michael.nitabach@yale.edu)

## Figure 1

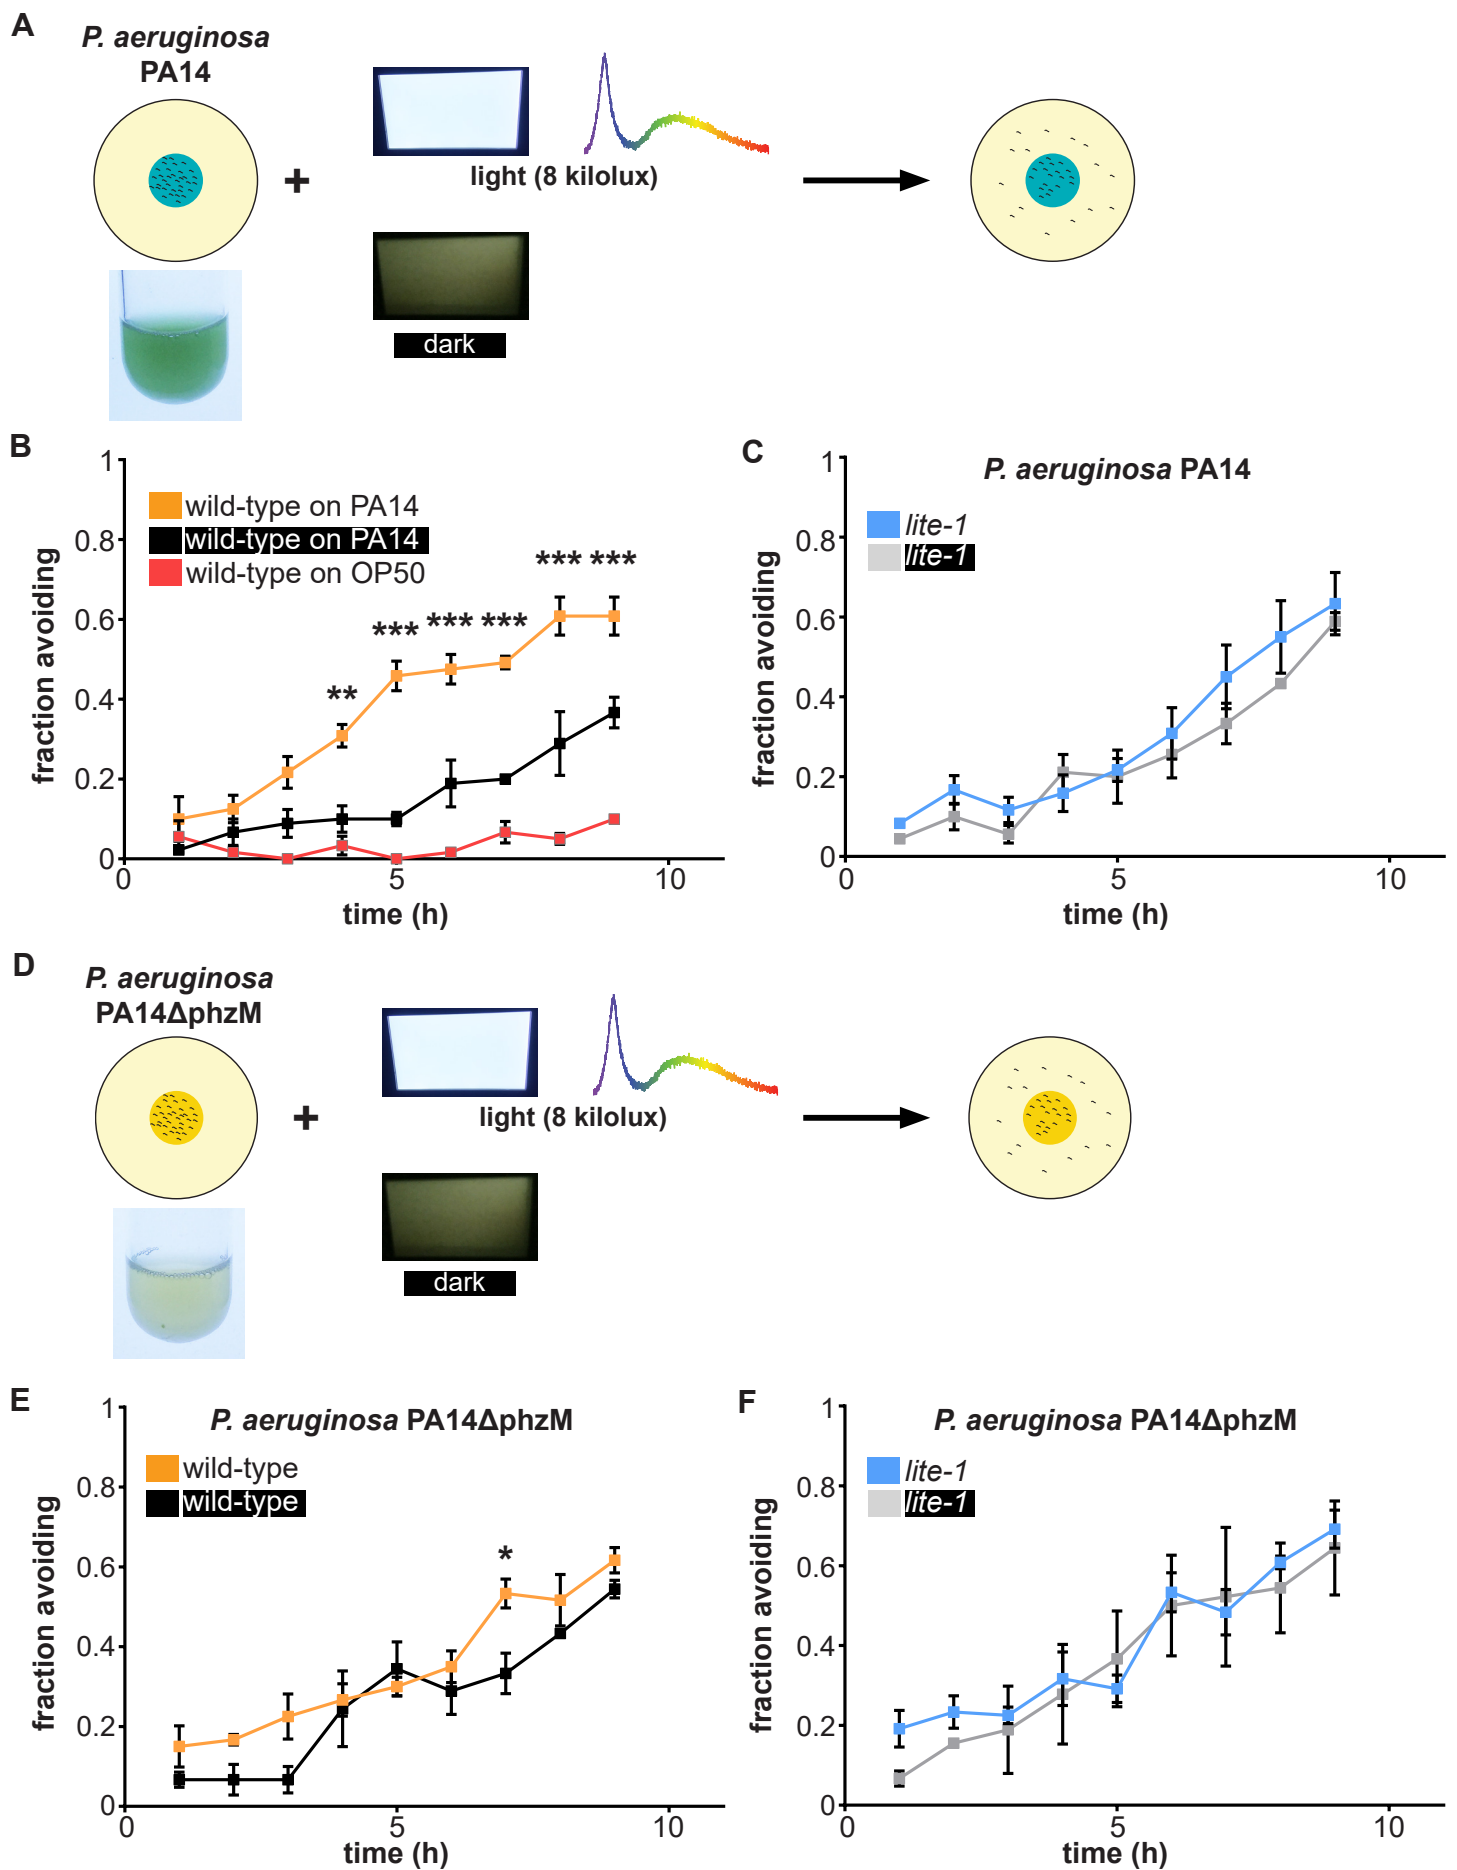

## Figure 2

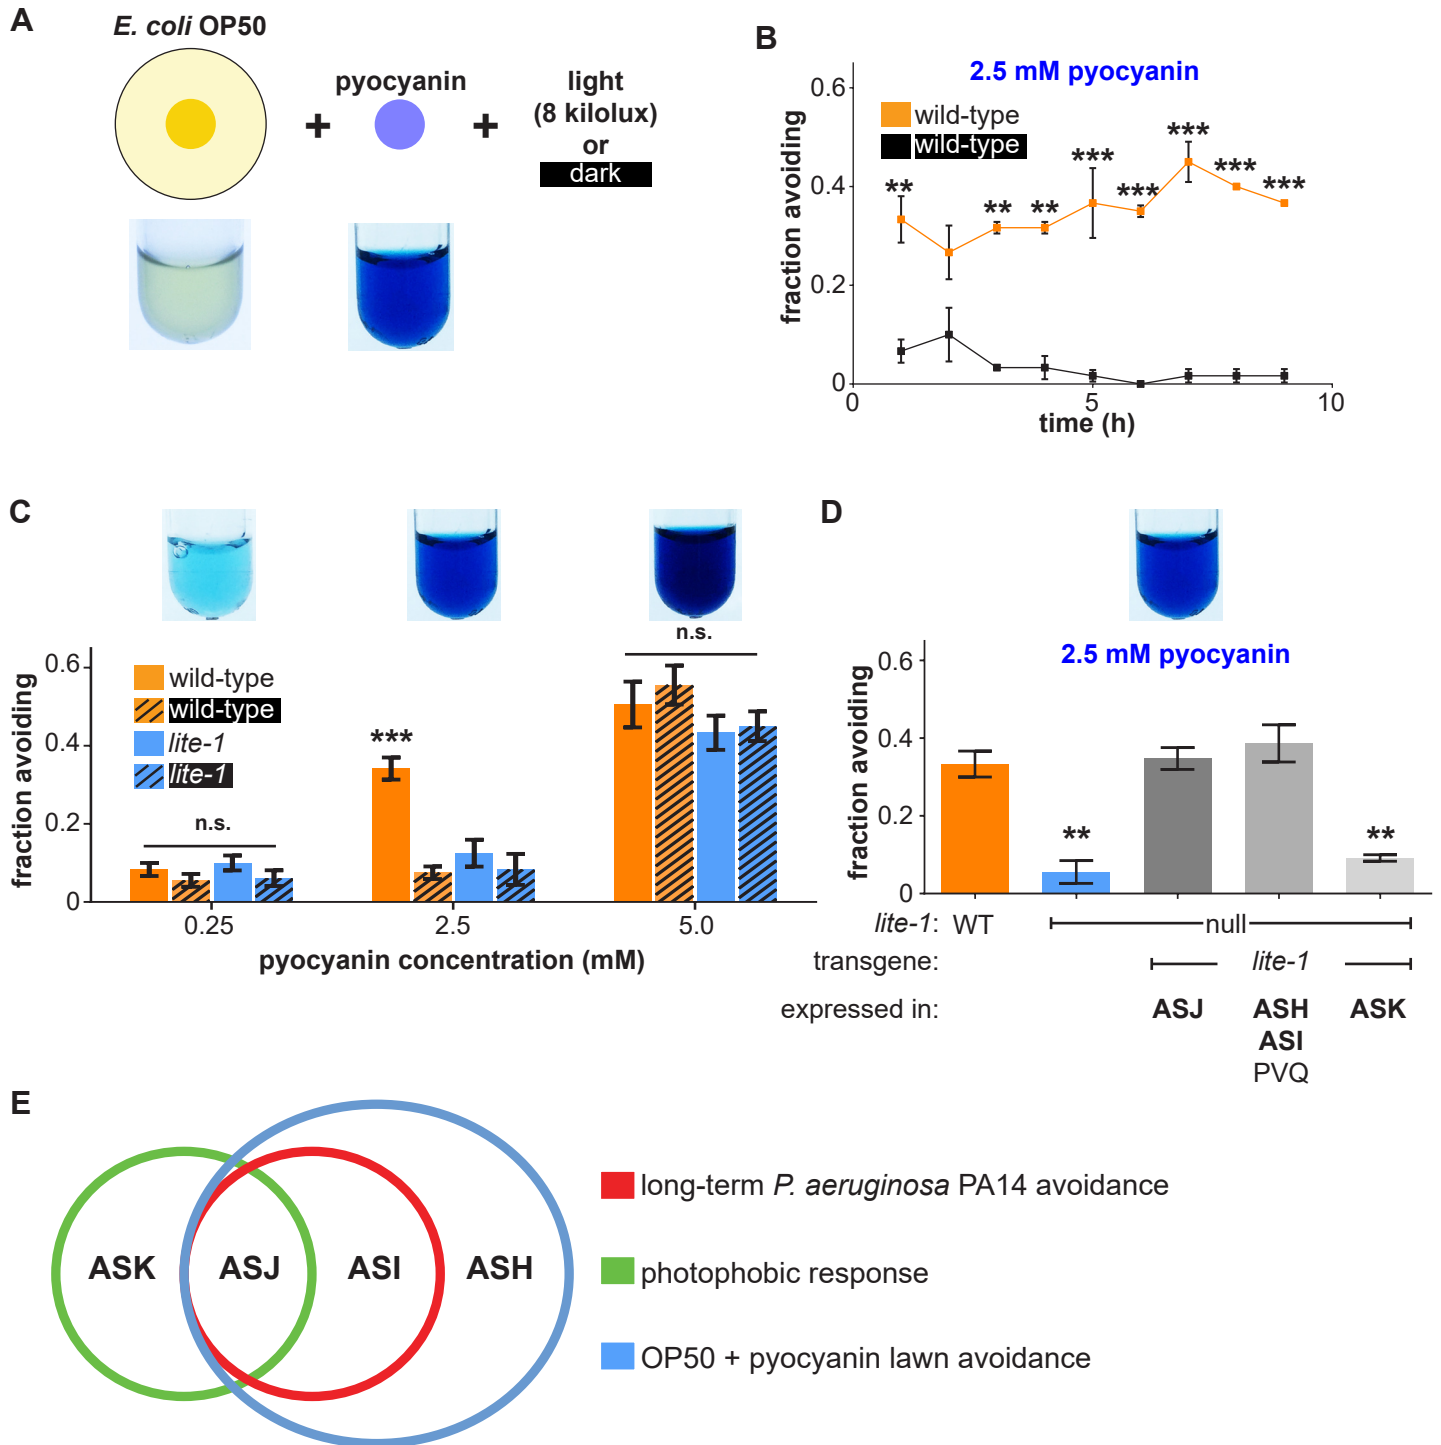

### Figure 3

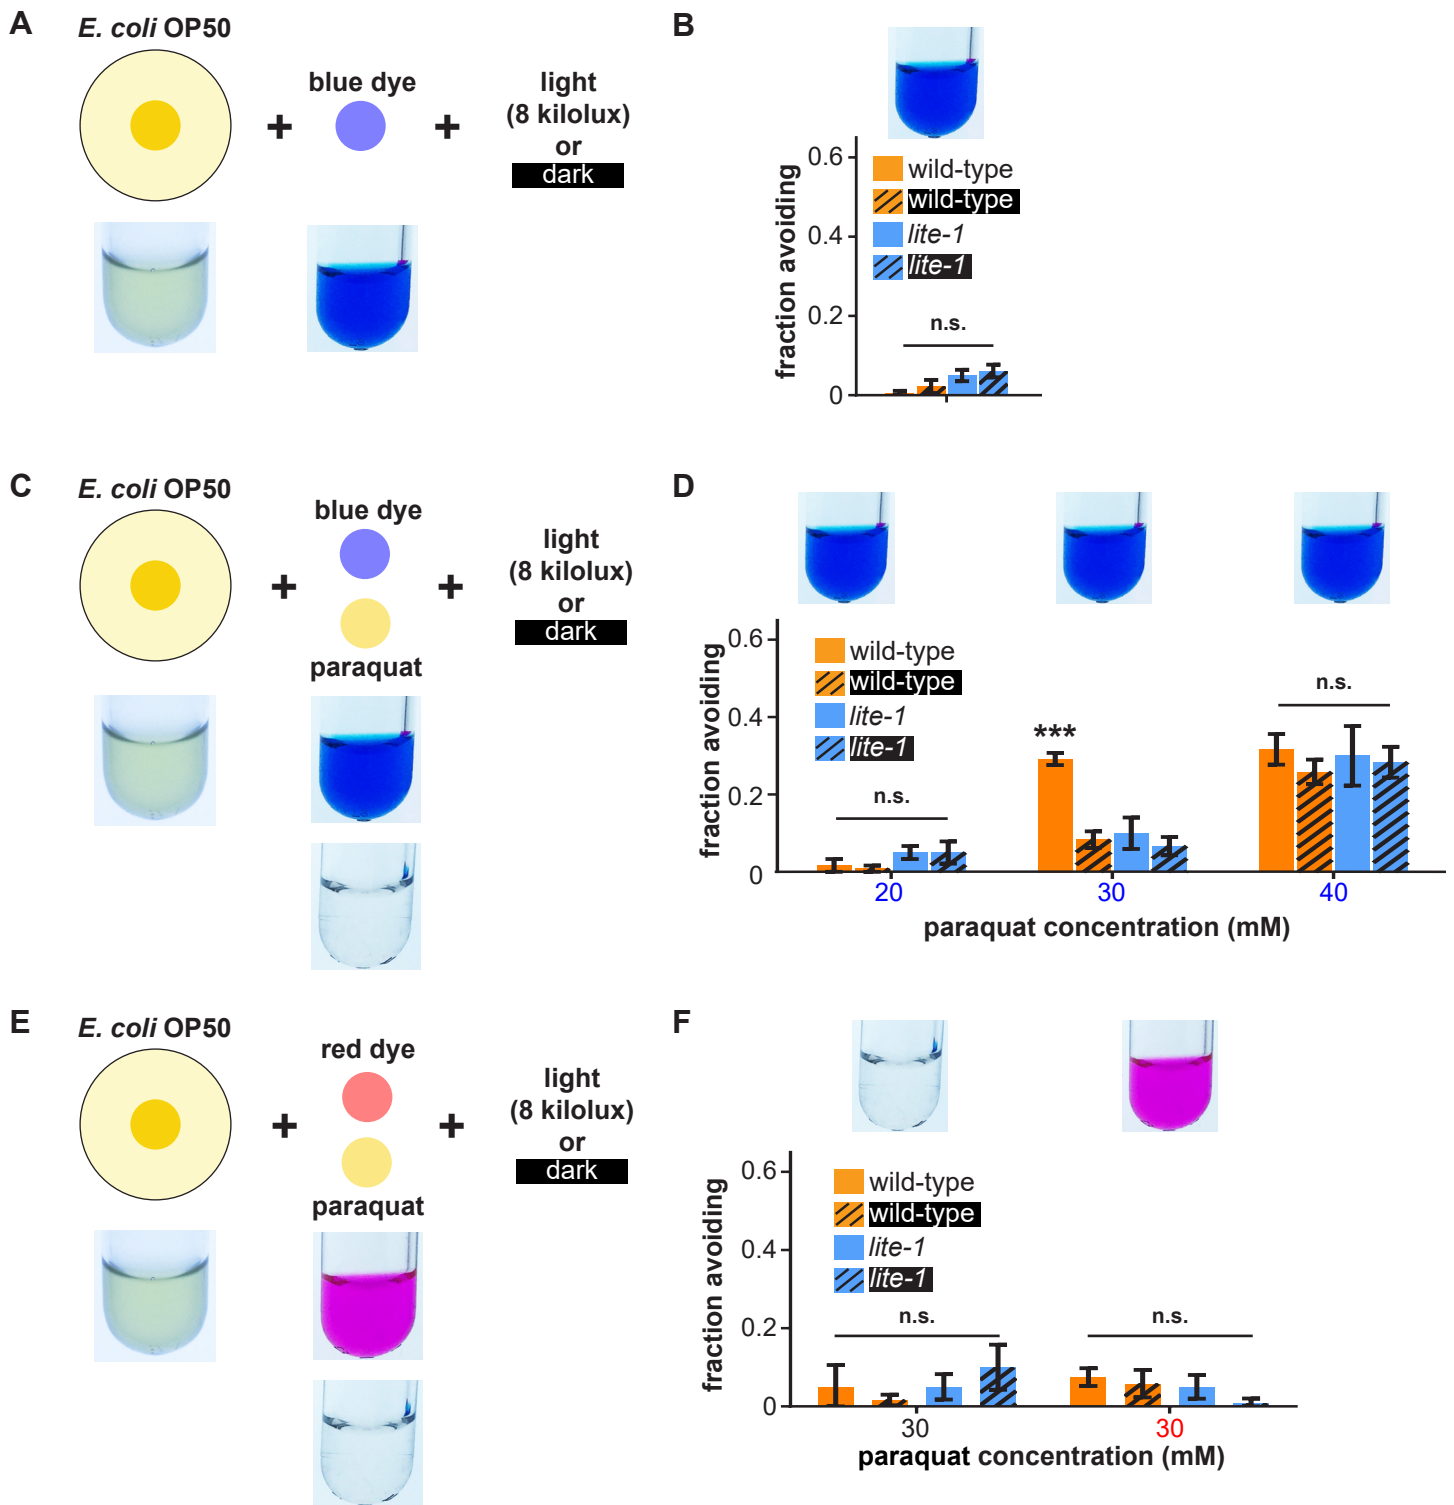

## Figure 4

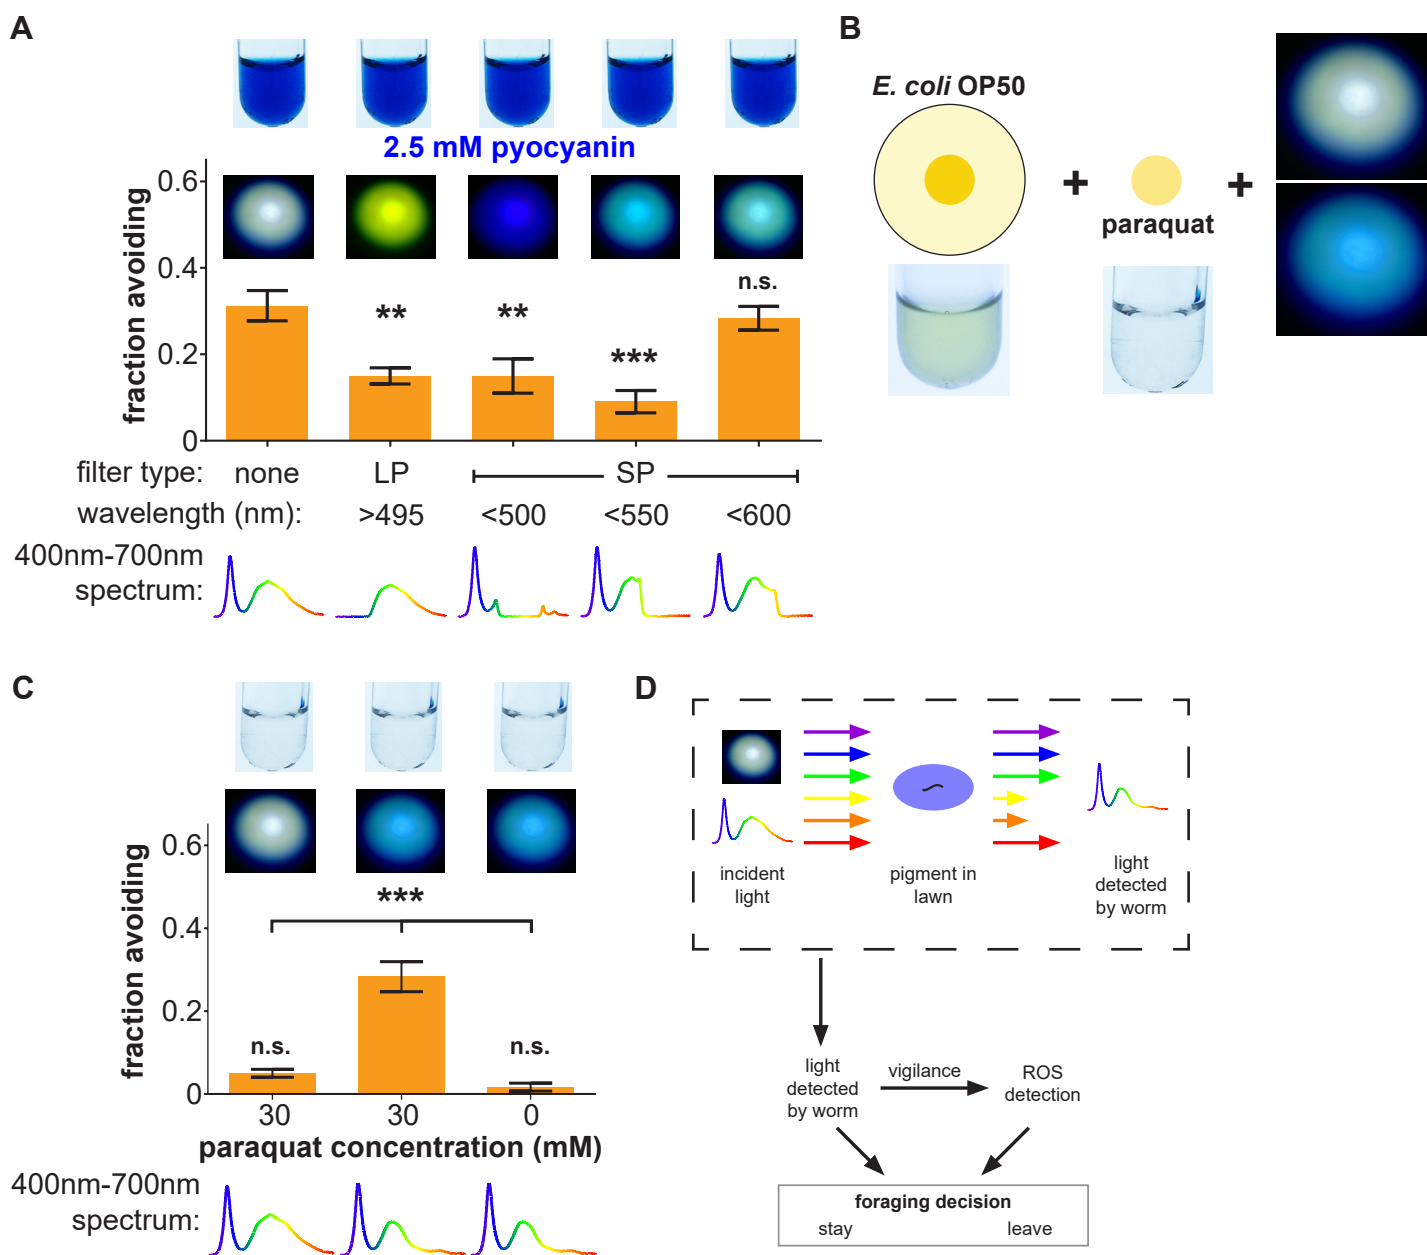

## Supplementary Figure 1

A

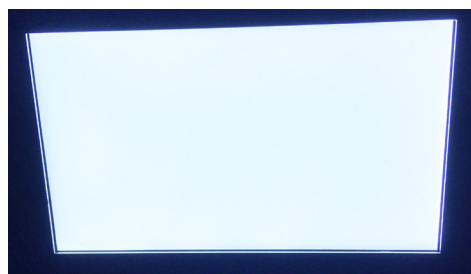

8 kilolux LED array white light  
source  
(Color temp.: 6500 K)

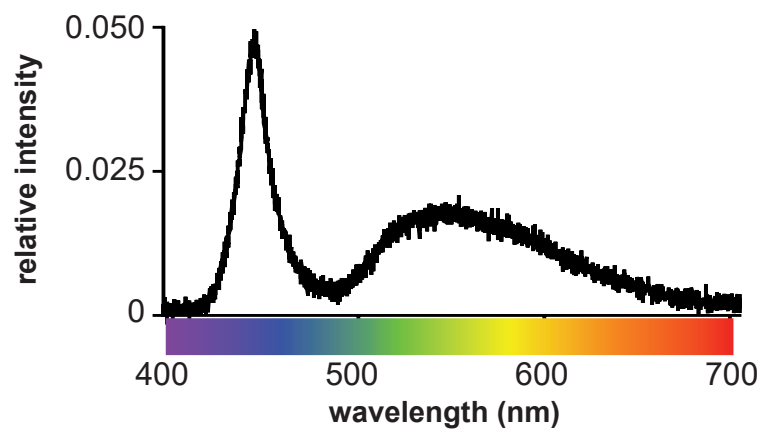



## Supplementary Figure 3

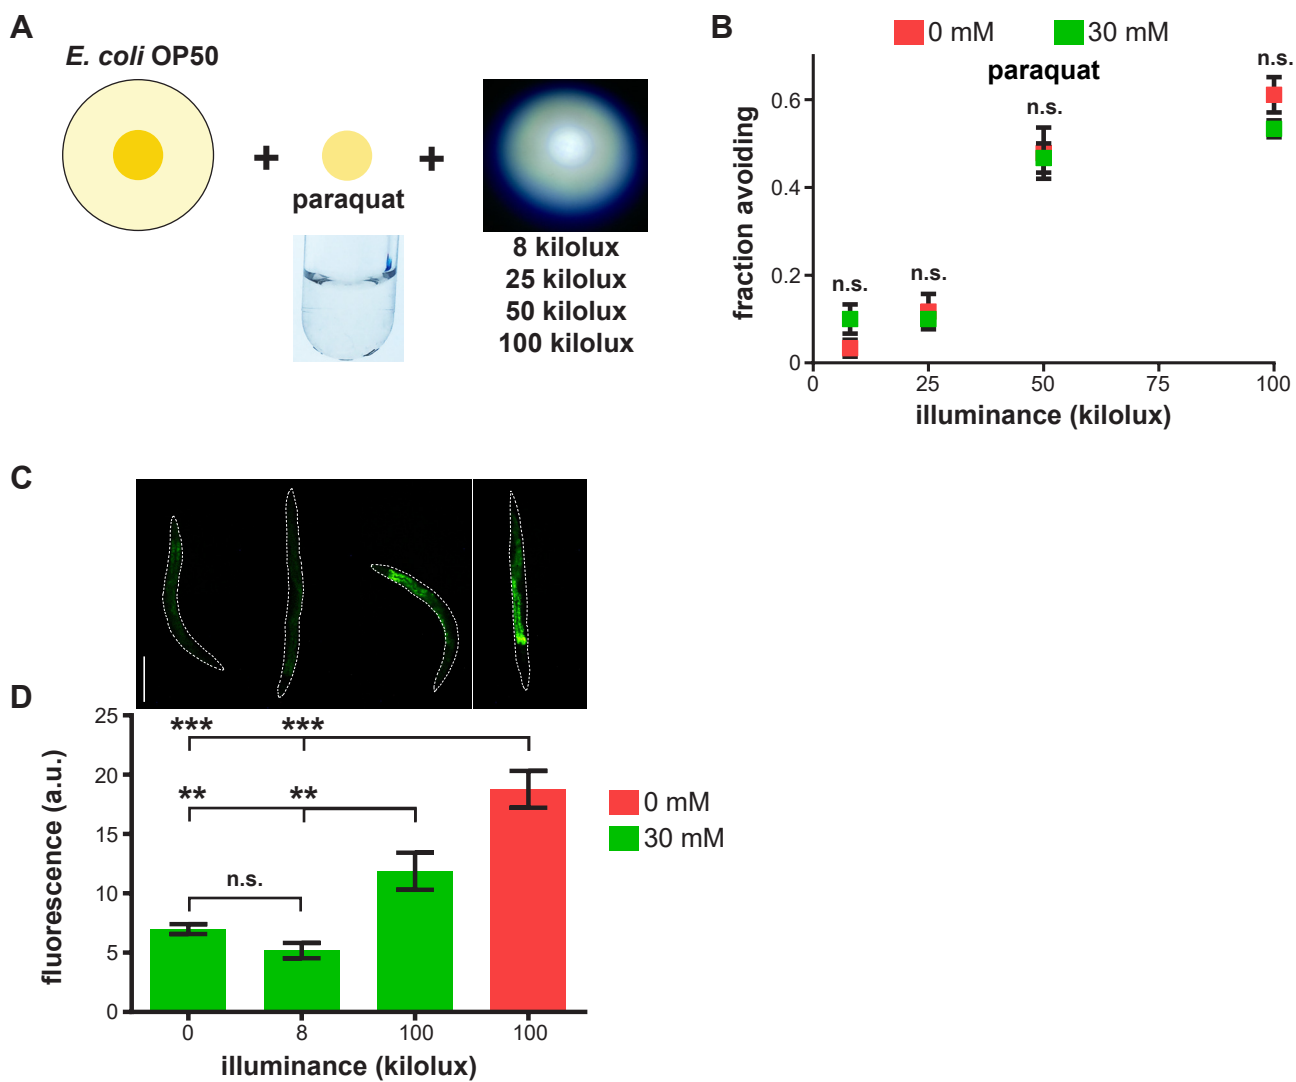

Source: http://www.biorxiv.org/content/10.1101/092072v1.full.pdf
